# Supplementary material
Source: MDPI journal article supplement (https://www.mdpi.com/2079-6412/11/1/95)
Supplement: s1 [file s1]

Archive with 3 entries (3 files):
- coatings-1028551 - Supplementary.pdf
- Movie S1.avi
- Movie S2.avi
