# Supplementary material
Source: MDPI journal article supplement (https://www.mdpi.com/2079-6412/11/1/95)
Supplement: s1 [file s1 › coatings-1028551 - Supplementary.pdf]

# Supplementary materials: One-step Methods to Fabricate Durable Superhydrophobic Coatings for Flexible Electronic Sensors

Xiang Liu <sup>1</sup>, Kai Chen <sup>2</sup>, Dekun Zhang <sup>2,\*</sup> and Zhiguang Guo <sup>3,4,\*</sup>

<sup>1</sup> School of Mechatronic Engineering, China University of Mining and Technology, Xuzhou 221116, China; xiangliu0229@163.com

<sup>2</sup> School of Materials Science and Physics, China University of Mining and Technology, Xuzhou 221116, China; cumtck@cumt.edu.cn (K.C.); dkzhang@cumt.edu.cn (D.Z.)

<sup>3</sup> Hubei Collaborative Innovation Centre for Advanced Organic Chemical Materials and Ministry of Education Key Laboratory for the Green Preparation and Application of Functional Materials, Hubei University, Wuhan 430062, China; zgao@licp.cas.cn

<sup>4</sup> State Key Laboratory of Solid Lubrication, Lanzhou Institute of Chemical Physics, Chinese Academy of Sciences, Lanzhou 730000, China

\* Correspondence: Dekun Zhang (E-mail address: dkzhang@cumt.edu.cn), Zhiguang Guo (E-mail address: zgao@licp.cas.cn).

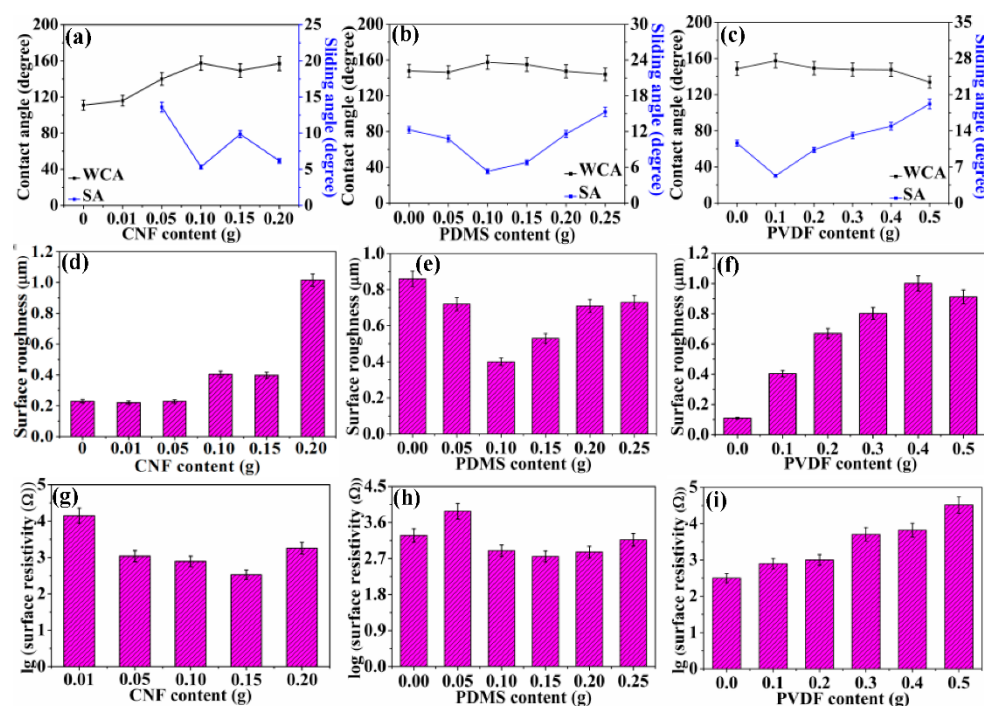

**Figure S1.** Line charts of the contact angle and sliding angle of the FCS coating at different (a) CNF, (b) PDMS and (c) PVDF contents. Variations in the surface roughness with (d) CNF, (e) PDMS and (f) PVDF contents. Variations in the surface resistivity with (g) CNF, (h) PDMS and (i) PVDF contents.

**Citation:** Liu, X.; Chen, K.; Zhang, D.; Guo, Z. One-step Methods to Fabricate Durable Superhydrophobic Coatings for Flexible Electronic Sensors. *Coatings* **2021**, *11*, 95. <https://doi.org/10.3390/coatings11010095>

Received: date: 21 November 2020

Accepted: date: 8 January 2021

Published: date: 12 January 2021

**Publisher's Note:** MDPI stays neutral with regard to jurisdictional claims in published maps and institutional affiliations.

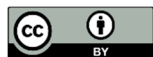

**Copyright:** © 2021 by the authors. Submitted for possible open access publication under the terms and conditions of the Creative Commons Attribution (CC BY) license (<http://creativecommons.org/licenses/by/4.0/>).

**Table S1.** The effect of CNF content on the surface resistivity.

| CNF Content (g) | wt %  | Surface Resistivity ( $\Omega$ ) | lg (Surface Resistivity) |
|-----------------|-------|----------------------------------|--------------------------|
| 0.01            | 4.76  | $1.41 \times 10^4$               | 4.15                     |
| 0.05            | 20.00 | $1.09 \times 10^3$               | 3.04                     |
| 0.10            | 33.33 | $7.84 \times 10^2$               | 2.89                     |
| 0.15            | 42.86 | $3.39 \times 10^2$               | 2.53                     |
| 0.20            | 50.00 | $1.81 \times 10^3$               | 3.26                     |

**Table S2.** The contact angle of water and diiodomethane on the polished FCS coating surface. The dispersion force and polarity force of water and Diiodomethane.

| Liquid Drop     | Contact Angle( $^\circ$ ) | Dispersive Force (mN/m) | Polarity Force (mN/m) |
|-----------------|---------------------------|-------------------------|-----------------------|
| Deionized water | 106.3                     | 21.8                    | 51.0                  |
| Diiodomethane   | 82.8                      | 49.5                    | 1.3                   |

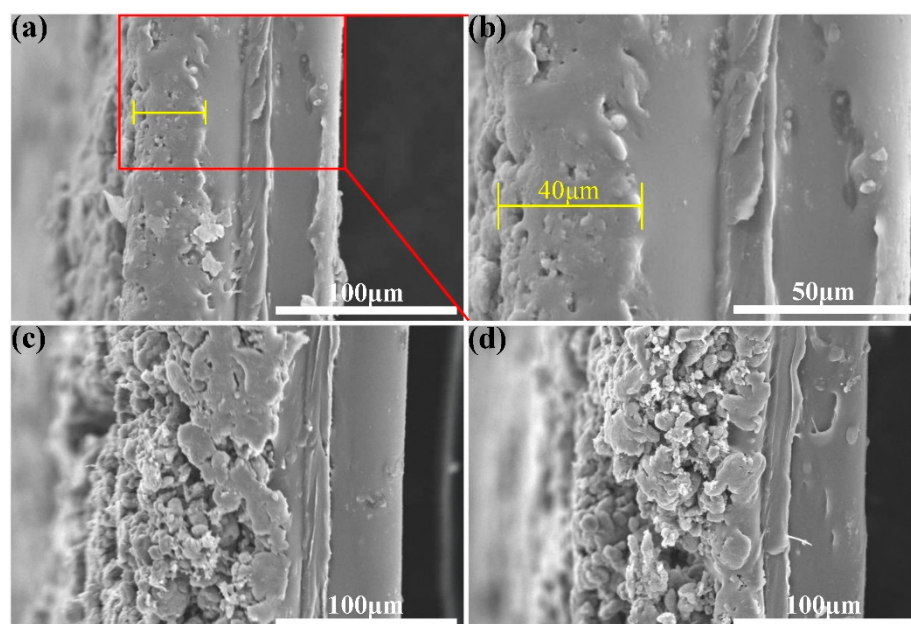**Figure S2.** Cross-section morphologies of the FCS coating prepared by brush coating under different magnifications ((a) 500 $\times$  SEM image and (b) 1000 $\times$  SEM image). Cross section morphologies of the FCS coatings obtained by spraying ((c) 500 $\times$  SEM image) and dip-coating ((d) 500 $\times$  SEM image).

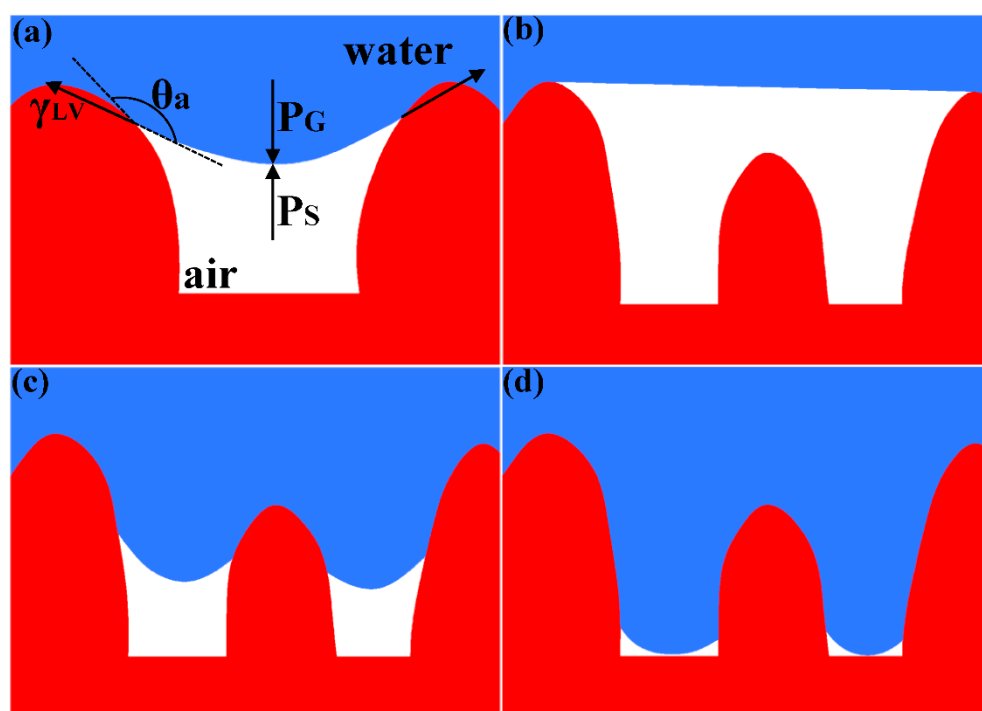

**Figure S3.** (a) Force analysis of water droplet in the FCS coating microstructure. Schematic diagram of gas-liquid interface changing with immersion time (b,c).
